# Supplementary material for: Isolation of a Novel Microcystin-Degrading Bacterium and the Evolutionary Origin of mlr Gene Cluster
Source: MDPI journal article supplement (doi:10.3390/toxins11050269), 2019-05-13
Supplement: s1 [file s1]

# Supplementary Materials: Isolation of a novel microcystin-degrading bacterium and the evolutionary origin of *mlr* gene cluster

Lian Qin, Xiaoxing Zhang, Xiaoguo Chen, Ke Wang, Yitian Shen and Dan Li

**Table S1.** Sequences used to construct assembled *mlr* gene cluster.

| Bacteria                           | GenBank accession no. |             |             |             |
|------------------------------------|-----------------------|-------------|-------------|-------------|
|                                    | <i>mlrA</i>           | <i>mlrB</i> | <i>mlrC</i> | <i>mlrD</i> |
| <i>Sphingopyxis</i> sp. C-1        | AB468058              | AB468059    | AB468060    | AB591070    |
| <i>Sphingopyxis</i> sp. LH21       | DQ112243              | DQ423530    | DQ423531    | DQ423532    |
| <i>Sphingopyxis</i> sp. MB-E       | KX822728              | KX822729    | KX822730    | KX822731    |
| <i>Sphingomonas</i> sp. ACM-3962   | AF411068              | KR150744    | AF411070    | AF411071    |
| <i>Sphingomonas</i> sp. NV3        | JN256930              | JN256929    | JN256928    | JN256927    |
| <i>Sphingosinicella</i> sp. Y2     | AB114203              | KY002145    | KY002149    | KY002153    |
| <i>Sphingosinicella</i> sp. JEZ-8L | KY364400              | KY364403    | KY364402    | KY364401    |
| <i>Sphingopyxis</i> sp. X20        |                       | MK758111    |             |             |
| <i>Novosphingobium</i> sp. THN1    |                       | HQ664118    |             |             |
| <i>Rhizobium</i> sp. TH            |                       | KX371892    |             |             |
| <i>Sphingosinicella</i> sp. B-9    |                       | AP018711*   |             |             |

\* Genome sequence.

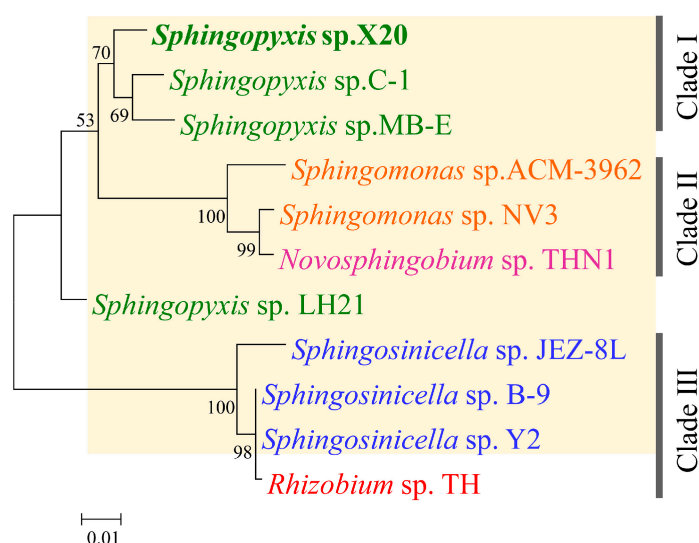

**Figure S1.** Phylogenetic tree inferred from protein sequences of spliced *mlr* sequences. Evolutionary analysis was conducted by Neighbor-Joining method in MEGA7. The numbers at each node were the bootstrap values for the percentages of 1000 replicate trees.

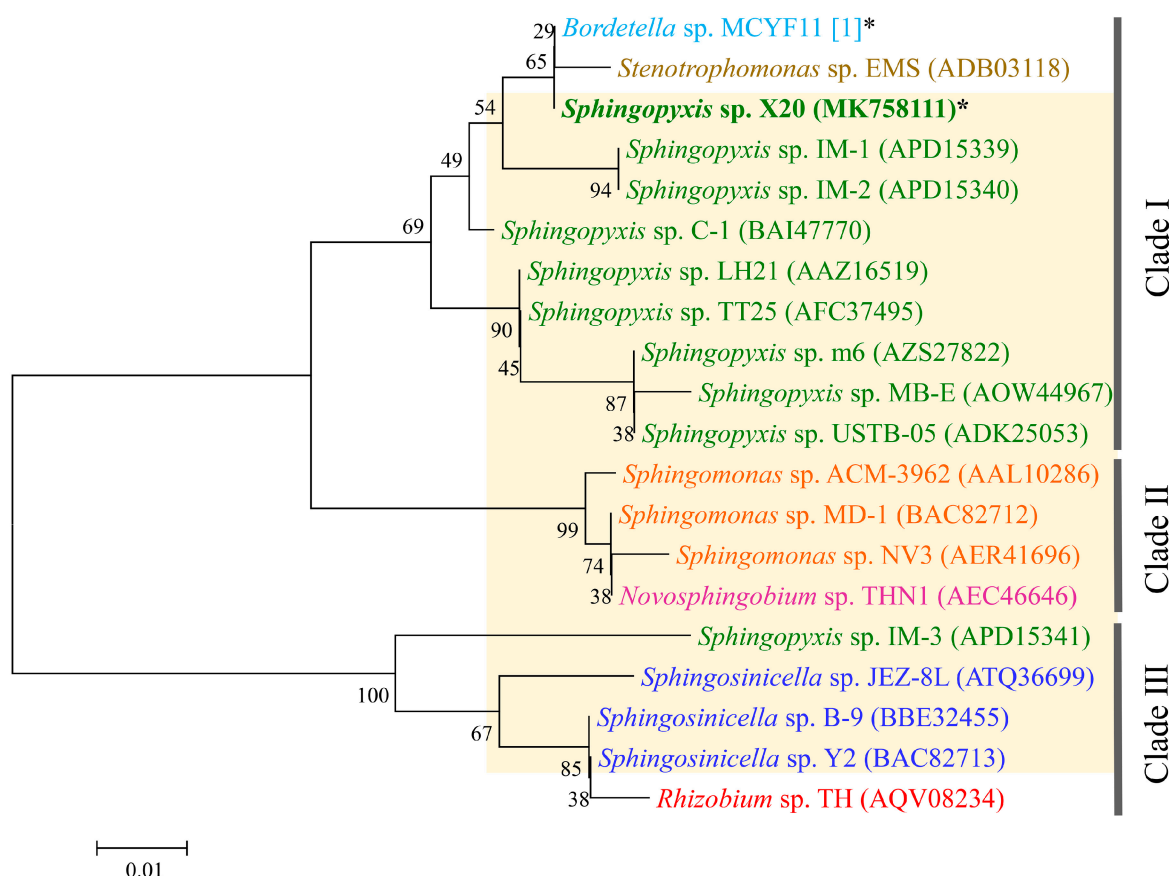

**Figure S2.** Phylogenetic tree based on MlrA protein sequences. Evolutionary analyses were conducted by the Neighbor-Joining method in MEGA7. The numbers at each node were the bootstrap values for the percentages of 1000 replicate trees. \* represent the protein sequence translated from the nucleotide sequence of the *mlrA* gene.

## References

1. Yang, F.; Zhou, Y.; Sun, R.; Wei, H.; Li, Y.; Yin, L.; Pu, Y. Biodegradation of microcystin-LR and-RR by a novel microcystin-degrading bacterium isolated from Lake Taihu. *Biodegradation* **2014**, *25*, 447–457, doi:10.1007/s10532-013-9673-y
